# Supplementary material for: Paired yeast one-hybrid assays to detect DNA-binding cooperativity and antagonism across transcription factors
Source: PubMed Central journal article supplement (PMC10584920; doi:10.1038/s41467-023-42445-6), 2023-10-18
Supplement: 41467_2023_42445_MOESM4_ESM.pdf [file 41467_2023_42445_MOESM4_ESM.pdf]

## **Description of Additional Supplementary Files**

### Supplementary Data File

Description: This file contains Supplementary Tables 1-16, as well as detailed notes about each table. These include information about DNA baits, protein ORF clones, protein pairs studied, pY1H events, and TF expression data.
